# Density-independent processes decouple component and ensemble density feedbacks

Corey J. A. Bradshaw<sup>1,2</sup> | Salvador Herrando-Pérez<sup>3</sup>

<sup>1</sup>Global Ecology, College of Science and Engineering, Flinders University, GPO Box 2100, Adelaide, South Australia 5001, Australia

<sup>2</sup>Australian Research Council Centre of Excellence for Australian Biodiversity and Heritage, EpicAustralia.org

<sup>3</sup>Department of Biogeography and Global Change, Museo Nacional de Ciencias Naturales, Spanish National Research Council (CSIC), Madrid, Spain

E-mails: corey.bradshaw@flinders.edu.au; shp@mncn.csic.es, salherra@gmail.com

## Abstract

Analysis of long-term trends in abundance provide insights into population dynamics. Population growth rates are the emergent interplay of fertility, survival, and dispersal, but the density feedbacks on some vital rates (component) can be decoupled from density feedback on population growth rates (ensemble). However, the mechanisms responsible for this decoupling are poorly understood. We simulated component density feedbacks on survival in age-structured populations of long-living vertebrates and quantified how imposed nonstationarity (density-independent mortality and variation in carrying-capacity) modified the ensemble feedback signal estimated from logistic-growth models to the simulated abundance time series. The statistical detection of ensemble density feedback was largely unaffected by density-independent processes, but catastrophic and proportional mortality eroded the effect of density-dependent survival on ensemble-feedback strength more strongly than variation in carrying capacity. Thus, phenomenological models offer a robust approach to capture density feedbacks from nonstationary census data when density-independent mortality is low.

## KEY WORDS

Australia, compensation, density dependence, carrying capacity, logistic growth, stationarity

## INTRODUCTION

Compensatory density feedback describes a population's ability to return to the environment's carrying capacity in response to an increase in population size<sup>1</sup>. This phenomenon is driven by adjustments to individual fitness imposed by variation in per-capita resource availability, and associated processes of predation, competition, parasitism, and dispersal<sup>2-5</sup>. As survival and fertility rates ebb and flow in response to variation in population density, it is theoretically possible to detect the density-feedback signal in time series of abundance monitored at regular intervals over a sufficient period<sup>2,6</sup>. There is now considerable evidence that survival and fertility track population trends in many vertebrate<sup>7-15</sup> and invertebrate<sup>16-22</sup> species. Therefore, given the irreplaceable importance of long-term monitoring of population size in applied ecology and conservation<sup>2</sup>, assessing the presence of

44 compensatory signals in censuses of population abundance remains an essential tool in the  
45 ecologist's toolbox<sup>23</sup>.

46 The family of self-limiting population-growth models including logistic growth curves  
47 ('phenomenological models' hereafter) are convenient for describing density-feedback  
48 signals in abundance time series<sup>3</sup>. These models use census data to quantify the net effect of  
49 population size  $N$  on the rate of instantaneous growth ( $r$ )<sup>24</sup>. Expressed as a proportional  
50 change in  $N$  between two time ( $t$ ) steps (e.g., years or generations), the assumption is that  $r =$   
51  $\log_e(N_{t+1}/N_t)$  summarises the combination or 'ensemble'<sup>2</sup> of all feedback mechanisms  
52 operating on individual 'component' demographic rates<sup>25</sup>. The problem is that population  
53 growth rates can be insensitive to variation in particular demographic rates<sup>26-28</sup>. Thus, across  
54 109 observed censuses of bird and mammal populations, the strength of 'component density  
55 feedback' (on demographic rates) explained only  $< 10\%$  of the strength of 'ensemble density  
56 feedback' (on population growth rate) using phenomenological models and after controlling for  
57 time-series length and body size<sup>2</sup>. The reasons for such decoupling are not well understood.

58 Determining the partial effects of different underlying mechanisms responsible for the  
59 decoupling of component and ensemble density feedbacks is most often impossible for real  
60 abundance time series. This analytical limitation occurs because the multiple, density-  
61 dependent and -independent mechanisms generating population fluctuations change  
62 themselves through time — a condition known as 'nonstationarity'<sup>29</sup>. We therefore  
63 constructed stochastic, age-structured populations with known, component density feedback  
64 on survival and imposed nonstationarity to population size via multiple demographic  
65 scenarios emulating density-independent mortality and variation in carrying capacity through  
66 time. We then simulated multiannual time series of abundance from those populations and  
67 estimated the strength of ensemble density feedbacks from these. Our prediction was that  
68 ensemble density feedbacks should track component feedbacks if survival has a demographic  
69 impact, mediated by population size, on the population growth rate of long-lived vertebrates,  
70 while our demographic framework allowed the quantification of true and false detection of  
71 ensemble density feedbacks.

72

## 73 **METHODS**

74 Our overarching aim was to simulate populations of long-living species and their time series  
75 of abundance with various sources of nonstationarity. We describe below the set of test  
76 species, the simulation of the base population model, component density feedbacks on  
77 survival and time series of population abundance, the demographic scenarios considered, and  
78 the phenomenological models used to quantify ensemble density feedbacks.

79

### 80 ***Test species***

81 As the variability in population growth rates is driven primarily by survival rates for slower  
82 life-history species of mammals<sup>30,31</sup> and birds<sup>32</sup>, we parameterised the simulated populations  
83 to characterise the plausible dynamics of 21 long-lived species of extant ( $n = 8$ ) and extinct ( $n$   
84  $= 13$ ) Australian vertebrates from five taxonomic/functional groups (herbivore  
85 vombatiformes and macropodiformes, large omnivore birds, carnivores, and invertivore  
86 monotremes), spanning mean adult body masses of 1.7–2786 kg and generation lengths of

87 2.3–21 years<sup>33</sup> (Table 1). These species differ in their resilience to environmental change, and  
 88 represent the slow end of the slow-fast continuum of life histories<sup>34</sup> where high survival rates  
 89 make it possible that reproductive efforts are dispersed over the lifetime of individuals<sup>35</sup>. A  
 90 full justification of the selection of our test species can be found in reference<sup>33</sup>.

91

92 **TABLE 1** Taxonomy and life-history characteristics of the 21 test species (all native to Australia) used to  
 93 simulate age-structured populations and time series of population abundance. *abb* = abbreviation of scientific  
 94 name, *M* = body mass (kg), *GL* = generation length (years), *q* = projection length (years)<sup>33</sup>.  
 95

| taxonomic/functional group   | species                           | abb | <i>M</i> | <i>GL</i> | <i>q</i> | status  |
|------------------------------|-----------------------------------|-----|----------|-----------|----------|---------|
| herbivore<br>vombatiformes   | <i>Diprotodon optatum</i>         | DP  | 2786     | 18.1      | 724      | extinct |
|                              | <i>Palorchestes azael</i>         | PA  | 1000     | 15.1      | 604      | extinct |
|                              | <i>Zygomaturus trilobus</i>       | ZT  | 500      | 13.2      | 528      | extinct |
|                              | <i>Phascolonus gigas</i>          | PH  | 200      | 10.7      | 428      | extinct |
|                              | <i>Vombatus ursinus</i>           | VU  | 25       | 10.0      | 400      | extant  |
| herbivore<br>macropodiformes | <i>Procoptodon goliath</i>        | PG  | 250      | 8.3       | 332      | extinct |
|                              | <i>Sthenurus stirlingi</i>        | SS  | 150      | 8.1       | 324      | extinct |
|                              | <i>Protomnodon anak</i>           | PT  | 130      | 7.8       | 312      | extinct |
|                              | <i>Simosthenurus occidentalis</i> | SO  | 120      | 7.8       | 312      | extinct |
|                              | <i>Metasthenurus newtonae</i>     | MN  | 55       | 6.0       | 240      | extinct |
|                              | <i>Osphranter rufus</i>           | OR  | 25       | 5.5       | 220      | extant  |
|                              | <i>Notamacropus rufogriseus</i>   | NR  | 14       | 6.3       | 252      | extant  |
| large omnivore birds         | <i>Genyornis newtoni</i>          | GN  | 200      | 20.0      | 800      | extinct |
|                              | <i>Dromaius novaehollandiae</i>   | DN  | 55       | 5.9       | 236      | extant  |
|                              | <i>Alectura lathamii</i>          | AL  | 2.2      | 6.8       | 272      | extant  |
| carnivores                   | <i>Thylacoleo carnifex</i>        | TC  | 110      | 9.1       | 364      | extinct |
|                              | <i>Thylacinus cynocephalus</i>    | TH  | 20       | 5.2       | 208      | extinct |
|                              | <i>Sarcophilus harrisii</i>       | SH  | 6.1      | 3.1       | 124      | extant* |
|                              | <i>Dasyurus maculatus</i>         | DM  | 2        | 2.3       | 92       | extant  |
| invertivore<br>monotremes    | <i>Megalibgwilia ramsayi</i>      | MR  | 11       | 16.4      | 656      | extant  |
|                              | <i>Tachyglossus aculeatus</i>     | TA  | 4        | 14.1      | 564      | extant  |

96 \* extant in Tasmania, currently extinct in mainland Australia

97

### 98 **Base (age-structured) population model**

99 The population model for each test species was a stochastic (parameters resampled within  
 100 their uncertainty bounds) Leslie transition matrix (**M**) following a pre-breeding design, with  
 101  $\omega+1$  (*i*)  $\times$   $\omega+1$  (*j*) elements (representing ages from 0 to  $\omega$  years) for females only, where  $\omega$   
 102 represents maximum longevity. Fertility ( $m_x$ ) occupied the first row of the matrix, survival  
 103 probabilities ( $S_x$ ) occupied the sub-diagonal, and the final diagonal transition probability  
 104 ( $M_{i,j}$ ) was  $S_\omega$  for all species — except *Vombatus ursinus* (VU; common wombat), *Thylacinus*  
 105 *cynocephalus* (TC; thylacine) and *Sarcophilus harrisii* (SH; devil) for which we set  $S_\omega = 0$  to  
 106 limit unrealistically high proportions of old individuals in the population given the evidence  
 107 for catastrophic mortality at  $\omega$  for the latter two species<sup>36-38</sup>. Multiplying **M** by a population  
 108 vector **n** estimates total population size ( $\Sigma n$ ) at each forecasted time step<sup>39</sup>. The base model  
 109 was parameterised with  $n_0 = ADMw$ , where **w** is the right eigenvector of **M** (stable stage  
 110 distribution), and *A* is the surface area of the study zone ( $A = 250,000$  km<sup>2</sup>) so that the species

111 with the lowest  $\mathbf{n}_0$  would have an initial population of at least several thousand individuals at  
112 the start of the simulations. Based on theoretical equilibrium densities ( $D$ , km<sup>-2</sup>) calculated  
113 for each taxon<sup>33</sup>, the species-specific carrying capacity  $K = DA$ .

114

### 115 **Density feedback on survival**

116 We simulated a compensatory density-feedback function by forcing a reduction modifier  
117 ( $S_{\text{red}}$ ) of the  $S_x$  vector in each model according to  $\Sigma \mathbf{n}$ :

$$118 \quad S_{\text{red}} = \frac{a}{1 + \left(\frac{\Sigma \mathbf{n}}{b}\right)^c} \quad [\text{eq 1}]$$

119 where the  $a$ ,  $b$ , and  $c$  constants for each species are adjusted to produce a stable population on  
120 average over 40 generations ( $40[G]$ ; see below)<sup>40,41</sup>. This formulation avoided exponentially  
121 increasing populations, optimised transition matrices to produce parameter values as close as  
122 possible to the maximum potential rates of instantaneous increase ( $r_m$ )<sup>33</sup>, and so ensured that  
123 long-term population dynamics were approximately stable at the species-specific  $K$  (see  
124 previous section). Here,

$$125 \quad G = \frac{\log((\mathbf{v}^T \mathbf{M})_1)}{\lambda_1} \quad [\text{eq 2}]$$

126  $(\mathbf{v}^T \mathbf{M})_1$  is the dominant eigenvalue of the reproductive matrix  $\mathbf{R}$  derived from  $\mathbf{M}$ , and  $\mathbf{v}$  is the  
127 left eigenvector<sup>39</sup> of  $\mathbf{M}$ . Thus, the total projection length in years ( $q$ ) varied across the 21 test  
128 species, from 92 (*Dasyurus maculatus*; DM; spot-tailed quoll) to 800 (*Genyornis newtoni*;  
129 GN; mihirung) years (median = 324 years with 95 % interquartiles of [108, 762] years; Table  
130 1), with one value of abundance being simulated per year. In each iteration and annual time  
131 step, the  $S_x$  vector was  $\beta$ -resampled assuming a 5% standard deviation of each  $S_x$  and a  
132 Gaussian-resampled  $m_x$  vector. We deliberately avoided applying density-feedback functions  
133 to fertility to isolate the component feedback to a single demographic rate.

134

### 135 **Nonstationarity**

136 We added nonstationarity to our base population model through a catastrophic (density-  
137 independent) mortality function to account for the probability of a catastrophic event ( $C$ )  
138 scaling to generation length among vertebrates<sup>42</sup>:

$$139 \quad C = \frac{pC}{G} \quad [\text{eq 3}]$$

140 where  $pC$  = probability of catastrophe set at 0.14 given this is the mean probability per  
141 generation observed across vertebrates<sup>42</sup>. Once invoked at probability  $C$ , a  $\beta$ -resampled  
142 proportion centred on 0.5 to the  $\beta$ -resampled  $S_x$  vector induced a ~ 50% mortality event for  
143 that year<sup>43</sup>. A catastrophic event is defined as "... any 1-yr peak-to-trough decline in  
144 estimated numbers of 50% or greater"<sup>42</sup>. The catastrophic function recreates the demographic  
145 effects of a density-independent process such as extreme weather events, fires, disease  
146 outbreaks, or human harvest. However, we considered the process here as a standard  
147 perturbation in all models, and then added specific types of additional perturbations per  
148 scenario (see demographic scenarios below).

149

### 150 **Abundance time series**

151 From the base models (parameterised to incorporate age structure, density feedbacks on  
152 survival, and catastrophic events in the Leslie matrices as described above), we generated

153 multiannual abundance time series up to  $40[G]$  for each species. We standardised projection  
154 length to  $40[G]$  because there is strong evidence that the length of a time series ( $q$ ) dictates  
155 the statistical power to detect an ensemble density-feedback signal in logistic growth curves<sup>6</sup>.  
156 Here, we summed the  $\mathbf{n}$  vector over all age classes to produce a total population size  $N_{t,i}$  for  
157 each year  $t$  of each iteration  $i$ . We rejected the first  $[G]$ -equivalent years of each projection as  
158 a burn-in to allow the initial (deterministic) age distribution to calibrate to the stochastic  
159 expression of stability under compensatory density feedback.

160 To ascertain the degree of nonstationary in the simulated abundance time series, we used  
161 Turchin's<sup>29</sup> definition of nonstationarity as temporally variant mechanisms generating  
162 population fluctuations. In that conceptual context, we calculated the mean and variance of  
163 return time ( $T_R$ ) — defined as the time required to return to equilibrium following a  
164 disturbance<sup>44</sup> — for each abundance time series as:

$$165 \quad \bar{T}_R = \frac{\sum_{m=1}^M T_{Rm}}{M} \quad [\text{eq 4}]$$

166 where  $\bar{T}_R$  is the mean  $T_R$  across  $M$  steps of the time series. For each  $m^{\text{th}}$  time step,

$$167 \quad T_{Rm} = S_{Cm} + S_{Fm} \quad [\text{eq 5}]$$

168 where:  $S_{Cm}$  is the number of complete time steps taken before reaching  $T_{Rm}$ , and  $S_{Fm}$  is the  
169 fraction of time required to reach  $T_{Rm}$  in the  $M^{\text{th}}$  (final) step:

$$170 \quad S_{Fm} = \frac{N_p - \bar{N}}{N_p - N_a} \quad [\text{eq 6}]$$

171 where  $\bar{N}$  is the mean of the abundance time series (a proxy for  $K$ ),  $N_p$  is the population size  
172 prior to crossing  $\bar{N}$ , and  $N_a$  is the population size after crossing  $\bar{N}$ .

173 The variance of  $T_R$  is:

$$174 \quad \text{Var}(T_R) = \frac{\sum_{m=1}^M (T_{Rm} - \bar{T}_R)^2}{M-1} \quad [\text{eq 7}]$$

175 Thus, when  $\bar{T}_R \ll \text{Var}(T_R)$  (i.e.,  $\bar{T}_R/\text{Var}(T_R) \ll 1$ ), the time series is considered to be highly  
176 nonstationary<sup>44</sup>.

177

### 178 **Demographic scenarios**

179 We generated 10,000 abundance time series over  $40[G]$  for each test species in each of nine  
180 demographic scenarios that combined different types and magnitudes of nonstationarity in the  
181 form of density-independent (catastrophic and proportional) mortality and variation in  
182 carrying capacity ( $K$ ) through time. Each times series represented the idiosyncratic  
183 demography of a unique population occupying an area of 250,000 km<sup>2</sup> with zero dispersal  
184 (see above).

185 We split the nine scenarios into two main groups: **(1)** eight testing the probability of a  
186 false negative (reduced detection of ensemble density feedback when a component feedback  
187 on survival existed), and **(2)** one testing the probability of a false positive (evidence of  
188 ensemble density feedback when a component feedback on survival was absent) (see details  
189 in Table 2). The false-negative scenarios included three subcategories: **(1.1)** *i.* fixed  $K$  with  
190 no perturbations other than the stochasticity imposed by resampling demographic rates in the  
191 Leslie matrices; **(1.2)** fixed  $K$  with generationally scaled catastrophes centred on 50%  
192 mortality *ii.* leading to  $\bar{r} \cong 0$ , *iii.* as in *ii.*, but with an additional, single ‘pulse’ perturbation of  
193 90% mortality applied across the entire age structure at 20 generations, *iv.* a ‘harvest’-like

194 process where a consistent proportion of individuals is removed from the  $\mathbf{n}$  vector at each  
195 time step to produce  $\bar{r} \cong -0.001$  (i.e., weak, monotonic decline in average population size), or  
196  $v$ . as in *iv*, but where the resultant  $\bar{r} \cong -0.01$  (i.e., strong, monotonic decline in average  
197 population size); and **(1.3)**  $K$  fluctuations with  $v_i$ . stochastically resampled  $K$  with a constant  
198  $\bar{K}$  and a constant variance (via resampling the  $b$  parameter in equation [1]), **vii.** as in *vi*, but  
199 where the resampling variance doubles over the projection interval (via a linear increase in  
200 the standard error used to resample the  $b$  parameter in equation [1]), and **viii.** as in *vi*, but  
201 where  $K$  declines at a rate of 0.001 over the projection interval (via decreasing the  $b$   
202 parameter in equation [1]). **2.** The false-positive scenario **2ix.** tested for false positives in the  
203 ensemble signal by imposing a density-independent mortality via an increase in the  
204 probability of catastrophe  $p_c$  in equation [3] to produce  $\bar{r} \cong 0$  over  $40[G]$ . In that scenario,  
205 we removed the component density-feedback on survival (i.e., setting  $S_{\text{red}} = 1$ ) —  
206 theoretically, populations lack a carrying capacity in the absence of density feedbacks.  
207

208 **TABLE 2** Demographic scenarios to quantify the detection of ensemble density-feedback signals in time series  
 209 of abundance using phenomenological models (logistic growth curves) if a component density feedback on  
 210 survival is present (1.  $H_0$ : false negatives), or absent (2.  $H_0$ : false positives). All scenarios were simulated over  
 211 40 generations across 21 vertebrate species. Time series obtained from simulated age-structured populations  
 212 (Leslie matrices) occupying 250,000 km<sup>2</sup> with no dispersal.  $G$  = generation,  $N$  = population abundance,  $K$  =  
 213 carrying capacity;  $\bar{r}$  = long-term mean instantaneous rate of population change, SD = standard deviation. See  
 214 test species in Table 1.  
 215

| scenario                                                                                              | catastrophe type      | description                                                                                                                                            |
|-------------------------------------------------------------------------------------------------------|-----------------------|--------------------------------------------------------------------------------------------------------------------------------------------------------|
| <b>1. <math>H_0</math>: false negatives (component feedback)</b>                                      |                       |                                                                                                                                                        |
| <i>1.1 no catastrophic mortality or fluctuation in <math>K</math></i>                                 |                       |                                                                                                                                                        |
| <i>i. <math>K_{\text{fixed}}, \bar{r} \cong 0</math></i>                                              | none                  | stochastically resampled survival rates in age-structured population                                                                                   |
| <i>1.2 catastrophic mortality (50%) and stable <math>K</math></i>                                     |                       |                                                                                                                                                        |
| <i>ii. <math>K_{\text{fixed}}, \bar{r} \cong 0</math>; sustained catastrophic mortality</i>           | generationally scaled | as in <i>i</i> , but with catastrophes                                                                                                                 |
| <i>iii. <math>K_{\text{fixed}}, \bar{r} \cong 0</math>; pulsed catastrophic mortality</i>             | generationally scaled | as in <i>ii</i> , but with a single 90% mortality pulse implemented at $20G$                                                                           |
| <i>iv. <math>K_{\text{fixed}}, \bar{r} \cong -0.001</math>; sustained proportional mortality</i>      | generationally scaled | as in <i>ii</i> , but with proportional removal of individuals from the $\mathbf{n}$ vector such that $\bar{r} = -0.001$ (slowly declining population) |
| <i>v. <math>K_{\text{fixed}}, \bar{r} \cong -0.01</math>; sustained proportional mortality</i>        | generationally scaled | as in <i>iv</i> , but where $\bar{r} = -0.01$ (rapidly declining population)                                                                           |
| <i>1.3 catastrophic mortality (50%) and fluctuation in <math>K</math></i>                             |                       |                                                                                                                                                        |
| <i>vi. <math>K_{\text{stochastic}}, \bar{r} \cong 0</math></i>                                        | generationally scaled | as in <i>ii</i> , but normally distributed $K$ varying randomly at each time step (SD = 5%)                                                            |
| <i>vii. <math>K_{\text{stochastic}}</math> with increasing variance; <math>\bar{r} \cong 0</math></i> | generationally scaled | as in <i>vi</i> , but variance in $K$ increased linearly from 5% to 10%                                                                                |
| <i>viii. <math>K_{\text{stochastic}}</math> declining, forcing <math>\bar{r} &lt; 0</math></i>        | generationally scaled | as in <i>vi</i> , but $K$ also decreases on average at a rate of -0.001                                                                                |
| <b>2. <math>H_0</math>: false positives (no component feedback)</b>                                   |                       |                                                                                                                                                        |
| <i>ix. no <math>K</math>; <math>\bar{r} \cong 0</math></i>                                            | temporally scaled     | probability of catastrophe increased over time such that $\bar{r} \cong 0$ (~ average stability)                                                       |

216  
 217

### 218 **Ensemble density feedbacks**

219 After generating 10,000 time series for each of the 21 species following the nine  
 220 demographic scenarios (totalling 189,000 individual time series), we applied  
 221 phenomenological models to each time series to test the statistical *evidence* for an ensemble  
 222 compensatory density feedback, as well as quantify the *strength* of that feedback. Our  
 223 phenomenological models included four variants of the general logistic growth curve<sup>45</sup>  
 224 following reference<sup>6</sup>:

$$225 \quad r = \log_e \left( \frac{N_{t+1}}{N_t} \right) = \alpha + \beta N_t + \varepsilon_t \quad [\text{eq 8}]$$

226 where  $N_t$  = population size at time  $t$ ,  $\alpha$  = intercept,  $\beta$  = strength of ensemble density feedback,  
227 and  $\varepsilon_t$  = Gaussian random variable with a mean of zero and a variance  $\sigma^2$  reflecting  
228 uncorrelated stochastic variability in the instantaneous rate of population change  $r$ . Our first  
229 two models are simple density-independent models (DI): (1) random walk, where  $\alpha = \beta = 0$ ,  
230 and (2) exponential growth, where  $\beta = 0$ . The second two variants are density-dependent or  
231 density-feedback models (DF): (3) Ricker-logistic<sup>46</sup>, and (4) Gompertz-logistic<sup>47</sup>, where  $N_t$   
232 on the right side of equation [8] is replaced with  $\log_e(N_t)$ . The latter two models represent  
233 alternative situations where population growth rate varies in response to unit (Ricker) or  
234 order-of-magnitude (Gompertz) changes in population size<sup>1</sup>.

235 After fitting each of the four phenomenological models to each time series, we calculated  
236 their relative likelihood by means of the Akaike's information criterion (AIC) corrected for  
237 finite number of samples (AIC<sub>c</sub>). We then expressed the *evidence* for an ensemble density-  
238 feedback signal Pr(DF) as the sum of AIC<sub>c</sub> weights ( $w_{AIC_c}$  = model probability)<sup>48</sup> for the  
239 Ricker- and Gompertz-logistic models (i.e.,  $\Sigma w_{AIC_c}$ -DF), and the *evidence* for a lack of such  
240 signal as the sum of AIC<sub>c</sub> weights for random walk and exponential growth (i.e.,  $\Sigma w_{AIC_c}$ -  
241 DI). This follows the logic that if  $\beta \neq 0$  between  $r$  and  $N_t$  (Ricker) or  $\log_e(N_t)$  (Gompertz) is  
242 more likely than  $\beta = 0$  (random walk and exponential growth), then there is stronger  
243 statistical support for an ensemble density feedback in the time series than not (i.e.,  $\Sigma w_{AIC_c}$ -  
244 DF >  $\Sigma w_{AIC_c}$ -DI implies Pr(DF) > 0.5).

245 We estimated the *strength* of the ensemble density-feedback signal as the negative value  
246 of  $\hat{\beta}$  estimated from the Gompertz-logistic model. We used the Gompertz-logistic  $\hat{\beta}$ , instead  
247 of the Ricker-logistic  $\hat{\beta}$ , to estimate this strength because only the former characterises the  
248 multiplicative nature of demographic rates<sup>2,49</sup>. To compare the component density feedback  
249 applied to survival in the stochastic age-structured models to the ensemble density feedback  
250 estimated from the abundance time series under the nine demographic scenarios, we plotted  
251 the negative value of Gompertz  $\hat{\beta}$  relative to  $1 - S_{red}$  across all 21 species modelled.

252 We tested the correlation between ensemble and component density-feedback strength,  
253 and between ensemble strength and the degree of stationarity, across species by calculating a  
254 bootstrapped estimate of Spearman's correlation  $\rho$  (treating relative differences in the metrics  
255 as ranks). We uniformly resampled 10,000 times from the 95% confidence interval of each  
256 metric for each species and demographic scenario, calculating  $\rho$  in turn, and then calculating  
257 the median and 95% confidence interval of  $\rho$ . The relationships between ensemble and  
258 component density-feedback strength (as well as between ensemble strength and stationarity)  
259 showed some non-linearity, so we also fit simple exponential plateau models of the form  $y =$   
260  $y_{max} - (y_{max} - y_0)e^{-kx}$  to these relationships. Here,  $y_0$  is the starting value of component strength,  
261  $y_{max}$  is the maximum component strength (- Gompertz  $\hat{\beta}$ ),  $k$  = rate constant (in units of  $x^{-1}$ ),  
262 and  $x$  is the component strength ( $1 - S_{red}$ ).

263

## 264 RESULTS

### 265 *Statistical evidence for density feedback*

266 For each test species, when the simulated populations were subjected to a compensatory  
267 density feedback on survival (age-structured Leslie matrices), the median probability for a  
268 statistical signal of ensemble compensatory density-feedback (Pr(DF) =  $\Sigma w_{AIC_c}$ -DF; see



269 Materials and methods) across 10,000 times series of abundance was near unity ( $> 0.99$ ) for  
270 the stable ( $\bar{r} \cong 0$ ) trajectories and most demographic scenarios (Fig. S1–S2 and S3 for  
271 probability density plots of Pr(DF) across scenarios and the bootstrapped mean Pr(DF) per  
272 species and scenario, respectively). Only the declining stochastic  $K$  scenario (1.3viii) had a  
273 slightly smaller median Pr(DF) at 0.95. For the false-positive scenario (2ix), the median  
274 Pr(DF) was 0.322. Generally, the extant dasyurid *S. harrissii* (SH; devil) and the flightless  
275 bird *Dromaius novaehollandiae* (DN; emu) had the weakest evidence for density feedback  
276 across the different scenarios (Fig. S3).

277 In summary, if a component density feedback was present, the phenomenological models  
278 mostly detected the ensuing ensemble feedback (true positive) — regardless of whether a  
279 simulated population was perturbed via density-independent removal of individuals, or  
280 altered  $K$  dynamics — in  $> 9$  of every 10 time series; while false positives (component  
281 feedback absent, ensemble feedback detected) occurred in  $< 4$  of every 10 times series.  
282

### 283 ***Degree of simulated stationarity***

284 The addition of the generationally scaled 50% catastrophic (density-independent) mortality  
285 reduced stationarity from a median of  $\bar{T}_R/\text{Var}(T_R) \sim 0.28$  (scenario 1.1i) to  $\sim 0.08$  (scenario  
286 1.2ii) (Fig. 1A). The scenarios imposing a catastrophic 90% mortality as a pulse at 20  
287 generations (1.2iii), or additional proportional mortality driving a moderately (1.2iv;  $\bar{r}$   
288  $= -0.01$ ) or rapidly (1.2v;  $\bar{r} = -0.001$ ) declining population over 40 generations, all reduced  
289 stationarity by approximately the same amount relative to the scenario without catastrophic  
290 mortality (1.1i) (Fig. 1C). For the scenarios emulating fluctuations in  $K$  (1.3vi–viii), adding  
291 stochasticity to  $K$  slightly increased stationarity relative to a fixed- $K$  scenario (Fig. 1E). Only  
292 when the stochastic  $K$  was forced to decline (scenario 1.3viii), the abundance time series  
293 became highly nonstationary (Fig. 1E). The false-positive scenario (2.ix) resulted in  
294 negligible change to stationarity when comparing populations experiencing (Fig. 2A), or not  
295 experiencing (Fig. 2B), a component density feedback on survival.

296 **FIGURE 1 (A, C, E)** Truncated violin plots showing the distribution of the stationarity index  $\bar{T}_R / \text{Var}(T_R)$   
 297 across 10,000 times series of population abundance per species and all 21 test species (see list in Table 1)  
 298 obtained from age-structured populations subjected to a compensatory component density feedback on survival  
 299 over 40 generations, according to nine demographic scenarios (detailed in Table 2). **(B, D, F)** Relationship  
 300 between strength of ensemble (slope coefficient  $\beta$  of the Gompertz-logistic model  $\times [-1]$ ) and component (1 -  
 301 the modifier  $S_{\text{red}}$  on survival) density feedback. **(A-B)** Scenarios without (blue: scenario 1.1*i*) and with (grey:  
 302 scenario 1.2*ii*) generationally scaled 50% catastrophic (density-independent) mortality. **(C-D)** Stable projections  
 303 with carrying capacity ( $K$ ) fixed (darker grey; scenario 1.2*ii*), a pulse disturbance of 90% mortality at the first 20  
 304 generations (20G; lighter grey; scenario 1.2*iii*), weakly declining ( $r \cong -0.001$ ; red; scenario 1.2*iv*), and strongly  
 305 declining ( $r \cong 0.01$ ; blue; scenario 1.2*v*). **(E-F)** Stable projections with  $K$  fixed (darker grey; scenario 1.2*ii*),  
 306 varying stochastically ( $K_{\text{stoch}}$ ) around a constant mean with a constant variance (lighter grey; scenario 1.3*vi*),  
 307 varying stochastically with a constant mean and an increasing variance ( $K_{\text{stoch}} \uparrow \text{Var}$ ; red; scenario 1.3*vii*), and  
 308 varying stochastically with a declining mean and a constant variance ( $\downarrow K_{\text{stoch}}$ ; blue; scenario 1.3*viii*). The fitted  
 309 curves across species are exponential plateau models of the form  $y = y_{\text{max}} - (y_{\text{max}} - y_0)e^{-kx}$ . Shaded regions  
 310 represent the 95% prediction intervals for each type. Also shown are the mean probabilities of median density  
 311 feedback (Pr(DF): sum of the Akaike's information criterion weights for the Ricker- and Gompertz-logistic  
 312 models across time series ( $\sum w\text{AIC}_c\text{-DF}$ ). Compensation implies that survival and population growth wane as  
 313 population abundance rises, and  $\bar{T}_R \gg \text{Var}(T_R)$  implies high stationarity.

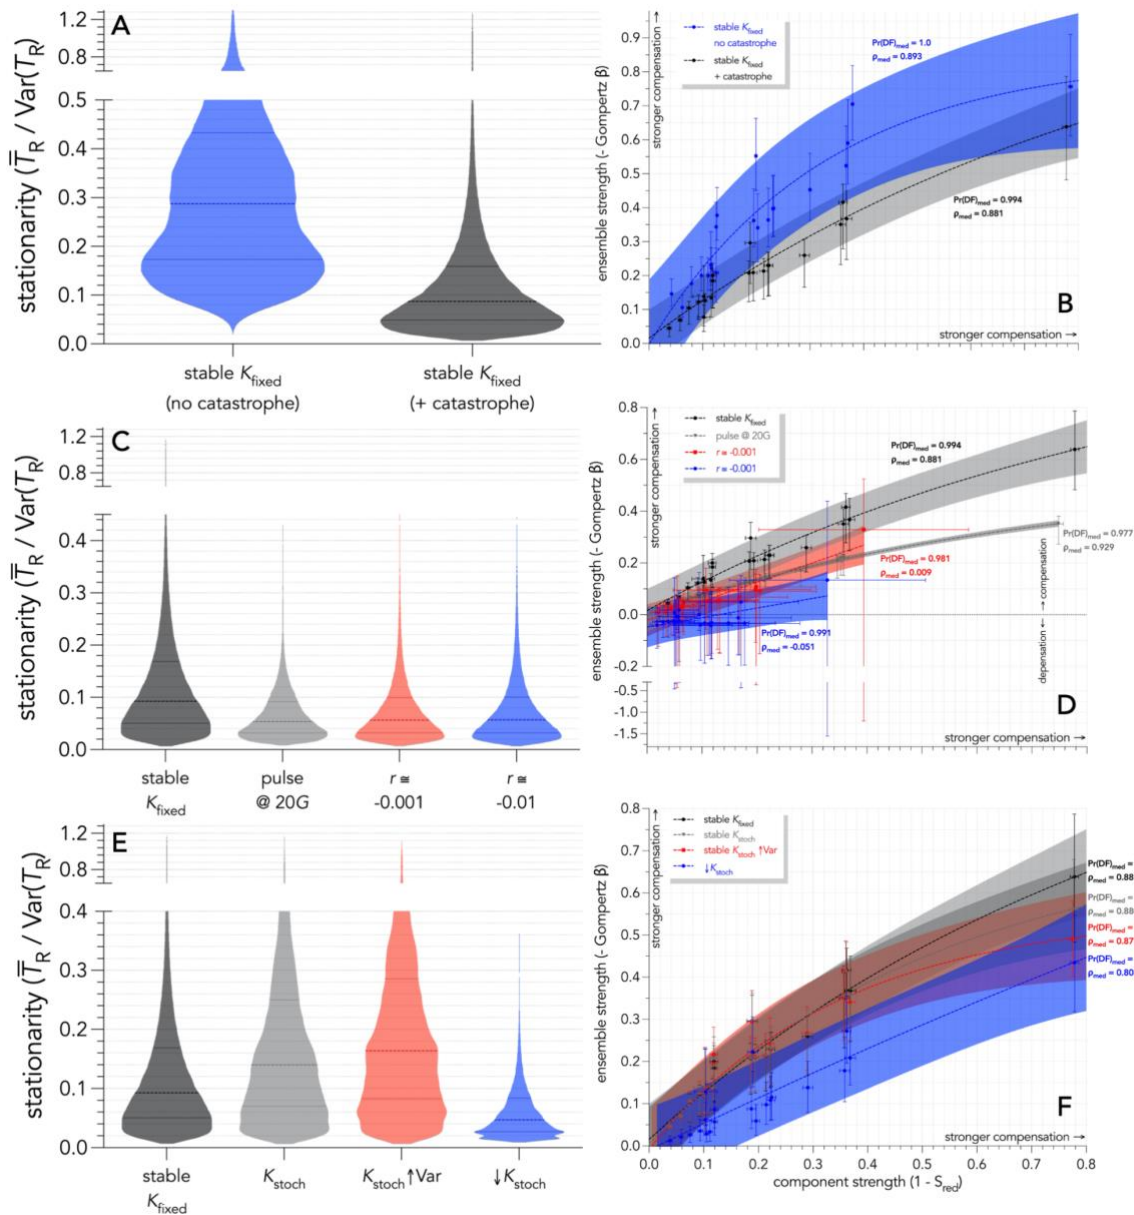

315 **FIGURE 2** (A) Truncated violin plots showing the distribution of the stationarity index  $\bar{T}_R/\text{Var}(T_R)$  across 10,000 times series of population abundance per species and all  
 316 21 species (see species list in Table 1) obtained from age-structured populations subjected to a compensatory component density feedback on survival over 40 generations,  
 317 according to two demographic scenarios (detailed in Table 2). Demographic scenarios include carrying capacity ( $K$ ) fixed with (darker grey, scenario 1.2*ii*) and without  
 318 (lighter grey, scenario 2*ix*) component compensatory density-feedback on survival, the latter including an increase in the probability of 50% catastrophic (density-  
 319 independent) mortality to produce stable population growth rates around 0 (see scenarios in Table 2). (B) Relationship between strength of ensemble (slope coefficient  $\beta \times [-$   
 320 1] of the Gompertz-logistic model) and generation length (years) across the 21 species. Probabilities of density feedback (Pr(DF) = sum of the Akaike's information criterion  
 321 weights for the Ricker and Gompertz models) calculated across simulations gave median Pr(DF) = 0.994 and 0.322 for the two stable scenarios without and with component  
 322 feedback on survival, respectively.

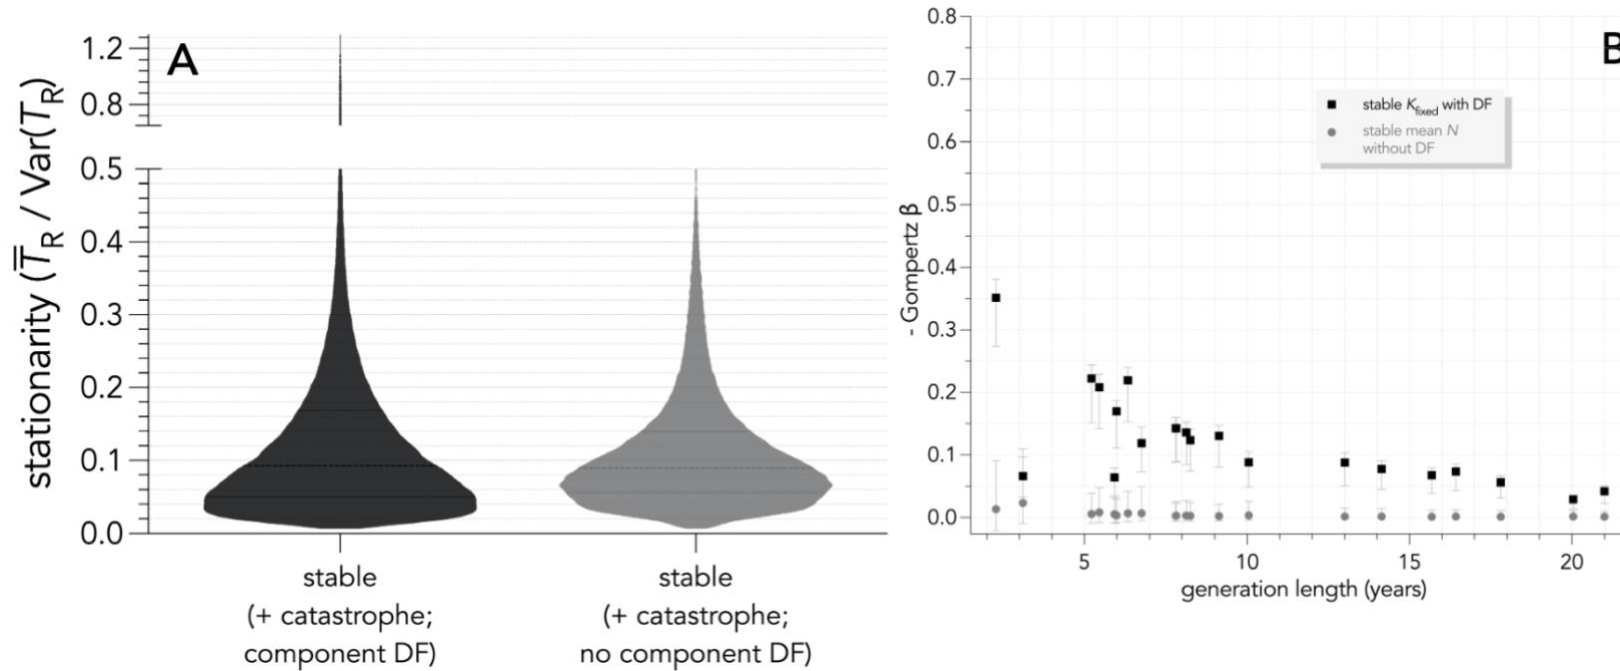

323

### 324 ***Strength of density feedback***

325 While the magnitude of statistical evidence for density feedback was largely invariant across  
326 all demographic scenarios including a component density feedback on survival (Fig. S1 and  
327 S2; see above), the estimated strength of the ensemble density feedback (-Gompertz  $\beta$ , see  
328 Materials and methods) was highly sensitive to the type of perturbation the population  
329 experienced. The addition of the generationally scaled 50% catastrophic (density-  
330 independent) mortality under a fixed  $K$  (scenarios 1.1*i* vs. 1.2*ii*) reduced the correlation  
331 (median  $\rho = 0.893$  and  $0.881$ , respectively) and slope between ensemble feedback strength  
332 and component feedback strength ( $1 - S_{\text{red}}$ ) across the 21 test species (Fig. 1B). The  
333 catastrophic pulse scenario (1.2*iii*) returned the closest correlation (median  $\rho = 0.929$ )  
334 between ensemble and component feedback strengths, although it also depressed the slope of  
335 the relationship relative to the  $K_{\text{fixed}}$  scenario (Fig. 1D). These correlations were weakest for  
336 the  $\bar{r} = -0.001$  and  $\bar{r} = -0.01$  scenarios (1.2*v-vi*; median  $\rho = 0.009$  and  $-0.051$ , respectively),  
337 which also captured a signal of depensation (population growth rate increases with  
338 population size) in some abundance time series (Fig. 1D). For the demographic scenarios  
339 emulating fluctuations in  $K$  (1.3), the correlation between unit change in ensemble and  
340 component density feedback strength was generally higher than those where  $\bar{r} < 0$  (Fig. 1F;  
341 median  $\rho$  ranging from  $0.803$  to  $0.881$ ), with the strongest mismatch occurring when  $K$   
342 declined by a rate of  $0.001$  (scenario 1.3*viii*) (Fig. 1F; see also Fig. S4). For the false-positive  
343 scenario (2*ix*), all estimated ensemble feedback strengths enveloped 0 (Fig. 2B), meaning that  
344 the estimated slopes of the  $r \sim \log_e(N_t)$  relationships could not be differentiated from zero.

345 Overall, when an ensemble density feedback was detected from time series of abundance,  
346 density-independent mortality eroded the extent by which true compensatory density  
347 feedbacks on survival translated into an ensemble compensatory density feedback in  
348 population trends more than fluctuations in  $K$ , with the most faulty outcome in fact inferring  
349 depensatory population growth rates from some populations only experiencing density  
350 compensation on survival.

351 On the other hand, the stationarity metric  $\bar{T}_R/\text{Var}(T_R)$  was a weak (median  $\rho =$   
352  $0.547$ ,  $-0.086$ , and  $-0.113$  for the pulse,  $\bar{r} = -0.001$ , and  $\bar{r} = -0.01$  scenarios, respectively)  
353 predictor of the estimated strength of ensemble feedback when density-independent mortality  
354 was imposed (Fig. 3). However, stationarity was a reasonable (median  $\rho = 0.756$ ,  $0.786$ , and  
355  $0.844$  for the  $K_{\text{stochastic}}$ ,  $K_{\text{stochastic}}$  with increasing variance, and declining  $K_{\text{stochastic}}$  scenarios,  
356 respectively) predictor of the ensemble signal for the fluctuating  $K$  scenarios (Fig. 4; see also  
357 Fig. S4).

358 **FIGURE 3** Relationships between the stationarity index  $\bar{T}_R/\text{Var}(T_R)$  and the strength of ensemble density  
359 feedback (slope coefficient  $\beta \times [-1]$  of the Gompertz-logistic model) for four scenarios with 50% catastrophic  
360 (density-indepedent) mortality across 21 test species (see Table 1) over 40 generations, including (A) carrying  
361 capacity ( $K$ ) fixed (scenario 1.2ii), (B) a pulse disturbance of 90% mortality at 20 generations (20G; scenario  
362 1.2iii), (C) weakly declining ( $r \cong -0.001$ , scenario 1.2iv), and (D) strongly declining ( $r \cong 0.01$ , scenario 1.2v)  
363 populations (scenarios detailed in Table 2). The fitted curves across species exponential plateau models of the  
364 form  $y = y_{\max} - (y_{\max} - y_0)e^{-\lambda x}$ . Shaded regions represent the 95% prediction intervals for each type.  $\rho_{\text{med}}$  are the  
365 median Spearman's  $\rho$  correlation coefficients for the relationship between the ensemble strength and stationarity  
index across species (resampled 10,000 times; see Fig. S4 for full uncertainty range of  $\rho$  in each scenario).

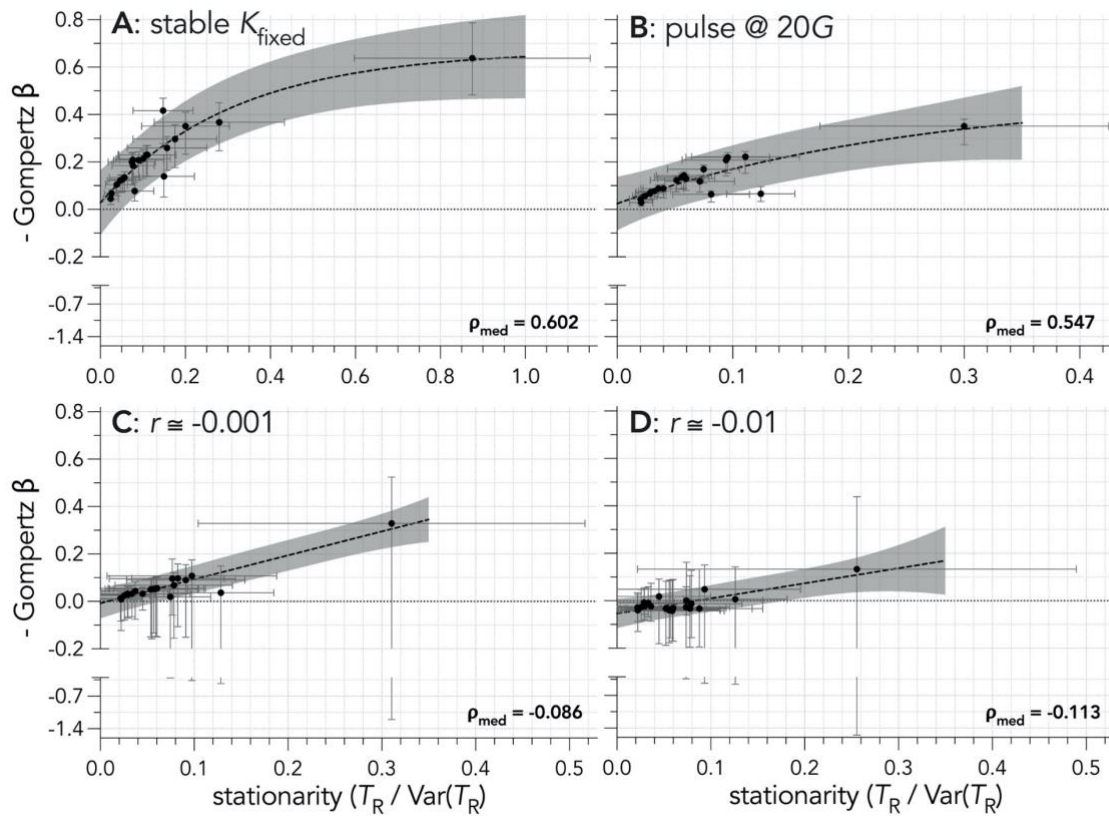

367  
368

369 **FIGURE 4** Relationships between the stationarity index  $\bar{T}_R/\text{Var}(T_R)$  and the strength of ensemble density  
370 feedback (slope coefficient  $\beta \times [-1]$  of the Gompertz-logistic model) across 21 test species (see list in Table 1)  
371 over 40 generations for four scenarios (scenarios detailed in Table 2) with 50% catastrophic (density-  
372 independent) mortality, including (A) carrying capacity ( $K$ ) fixed (scenario 1.2ii), (B)  $K$  varying stochastically  
373 ( $K_{\text{stoch}}$ ) around a constant mean with a constant variance (scenario 1.3vi), (C)  $K$  varying stochastically with a  
374 constant mean and increasing variance ( $K_{\text{stoch}} \uparrow \text{Var}$ , scenario 1.3vii), and (D)  $K$  varying stochastically with a  
375 declining mean and a constant variance ( $\downarrow K_{\text{stoch}}$ , scenario 1.3viii). The fitted curves across species exponential  
376 plateau models of the form  $y = y_{\text{max}} - (y_{\text{max}} - y_0)e^{-kx}$ . Shaded regions represent the 95% prediction intervals for  
377 each type.  $\rho_{\text{med}}$  are the median Spearman's  $\rho$  correlation coefficients for the relationship between the ensemble  
378 strength and stationarity index across species (resampled 10,000 times; see Fig. S4 for full uncertainty range  
379 under each scenario).

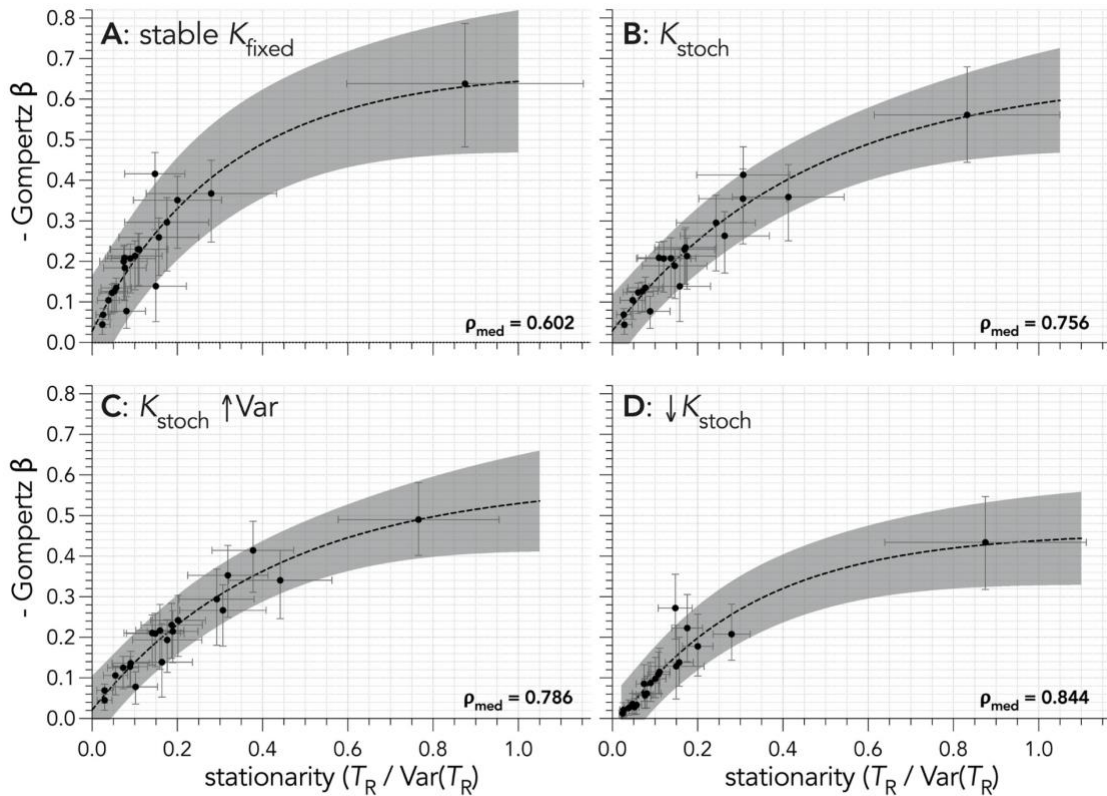

380  
381

## DISCUSSION

Our simulations reveal several new insights into how ensemble (population growth rates) and component (vital rates) density feedbacks can be decoupled. First, the statistical detection of true ensemble feedback strength through phenomenological models is little affected by nonstationarity *per se*. Second, the estimation of ensemble feedback strength through phenomenological models (logistic growth curves; see Introduction) are particularly sensitive to density-independent mortality leading to population decline, but they are less sensitive to moderate fluctuations in carrying capacity. Third, the concern that density-independent processes can invoke false evidence of ensemble signals of compensation are not borne out by our simulations, at least with respect to density-independent mortality.

The mechanisms underlying those trends are nuanced by species' life histories. For instance, in long-living terrestrial vertebrates (our focus), density feedbacks might operate on fertility to compensate for pathogen-induced adult mortality<sup>50</sup>, those feedbacks might be stronger on survival *versus* fertility when populations are near or far from carrying capacity, respectively<sup>51</sup>, and survival can be entirely driven by climatic conditions and density-independent predation<sup>52</sup>. In one of the best-studied systems in this regard, Soay sheep from St. Kilda Archipelago (United Kingdom) demonstrate that the demographic role of density and weather varies across sexes and age classes in mild winters, but survival is reduced consistently in all individuals in years of bad weather and high population abundance<sup>53</sup>. Much less-studied than herbivores, inter-pack aggression in carnivores with strong social hierarchies like wolves might shape survival at high densities, but be demographically irrelevant at low densities resulting from prey shortages and/or hunting or culling<sup>54</sup>. Our study lends credence to the application of phenomenological models to the former types of studies addressing the long-term effect of vital rates on population abundance, provided there is enough information available for describing population trends.

Our approach and results do not, of course, explain all possible scenarios leading to the decoupling of ensemble and component feedback signals. For example, many other density-independent factors that we did not consider can dampen the demographic role of social and trophic interactions mediated by population size<sup>2</sup>. Along with the confounding effects of sampling error<sup>55,56</sup>, some of those factors include immigration<sup>57</sup>, spatial heterogeneity in population growth rates<sup>58,59</sup>, fluctuating age structure<sup>60</sup>, and environmental state shifts<sup>29,61,62</sup>. Furthermore, our choice to limit the component mechanisms to feedback on a single demographic rate (albeit, applied to all age classes) for the sake of simpler interpretation could limit the application of our conclusions. For example, additional density-feedback mechanisms operating independently on other demographic rates, such as fertility and dispersal, could potentially complicate the interpretation derived from phenomenological models.

Simulating closed populations potentially inflated the phenomenological model's capacity to detect the component signal, because permanent dispersal could alleviate per capita reductions in fitness as a population approaches carrying capacity. We also limited our projections to a standardised 40 generations, but even expanding these to 120 generations resulted in little change in the stationarity metric (Fig. S5). Complementary studies focussing on the faster end of the life-history continuum could provide further insights, even though our

range of test species still precipitated a life-history signal in terms of component (Fig. S6) and ensemble density-feedback strengths and stationarity (Fig. S7, S8) declining with increasing generation length. However, this relationship faded when the trajectories simulated declines through proportional removal. Indeed, both evidence for<sup>63</sup> and strength<sup>34</sup> of ensemble density feedback generally increase along the continuum of slow to fast life histories, because species with slow life histories are assumed to be more demographically stable when density compensation is operating<sup>64</sup>.

While quantifying the true extent of all component density feedback mechanisms operating in real populations will remain challenging in most circumstances, phenomenological models can normally capture the evidence for and strength of the component density feedback mechanism at play. Appreciating the degree of nonstationarity and other types of perturbations affecting abundance time series can contextualise interpretations of ensemble density-feedback signals, especially where substantial density-independent mortality leads to long-term population declines. Importantly, failing to capture density feedback in applied ecological models can lead to suboptimal conservation and management recommendations and outcomes<sup>2,65</sup>.

## ACKNOWLEDGEMENTS

This study was supported by the Australian Research Council through a Centre of Excellence grant (CE170100015) to C.J.A.B. S.H.P. also funded by European Union's LIFE18 NAT/ES/000121 LIFE DIVAQUA. We acknowledge the Indigenous Traditional Owners of the land on which Flinders University is built — the Kaurna people of the Adelaide Plains.

## AUTHOR CONTRIBUTIONS

CJAB conceived the idea, ran the simulations, and wrote the first draft. SHP reviewed the literature. Both authors contributed to revisions.

## DATA AVAILABILITY STATEMENT

All data files and R code are openly available at <https://github.com/cjabradshaw/DensityFeedbackSims>.

## REFERENCES

- 1 Herrando-Pérez, S., Delean, S., Brook, B. W. & Bradshaw, C. J. A. Density dependence: an ecological Tower of Babel. *Oecologia* **170**, 585-603, doi:10.1007/s00442-012-2347-3 (2012).
- 2 Herrando-Pérez, S., Delean, S., Brook, B. W. & Bradshaw, C. J. A. Decoupling of component and ensemble density feedbacks in birds and mammals. *Ecology* **93**, 1728-1740, doi:10.1890/11-1415.1 (2012).
- 3 Eberhardt, L. L., Breiwick, J. M. & Demaster, D. P. Analyzing population growth curves. *Oikos* **117**, 1240-1246 (2008).
- 4 Fowler, C. W. Density dependence as related to life history strategy. *Ecology* **62**, 602-610 (1981).
- 5 Matthysen, E. Density-dependent dispersal in birds and mammals. *Ecography* **28**, 403-416 (2005).
- 6 Brook, B. W. & Bradshaw, C. J. A. Strength of evidence for density dependence in abundance time series of 1198 species. *Ecology* **87**, 1445-1451, doi:10.1890/0012-9658(2006)87%5B1445:SOEFDD%5D2.0.CO;2 (2006).
- 7 Owen-Smith, N. & Mason, D. R. Comparative changes in adult vs. juvenile survival affecting population trends of African ungulates. *J. Anim. Ecol.* **74**, 762-773, doi:10.1111/j.1365-2656.2005.00973.x (2005).



- 8 Eberhardt, L. L. A paradigm for population analysis of long-lived vertebrates. *Ecology* **83**, 281-2854 (2002).
- 9 Paradis, E., Baillie, S. R., Sutherland, W. J. & Gregory, R. D. Exploring density-dependent relationships in demographic parameters in populations of birds at a large spatial scale. *Oikos* **97**, 293-307, doi:10.1034/j.1600-0706.2002.970215.x (2002).
- 10 Saunders, S. P., Cuthbert, F. J. & Zipkin, E. F. Evaluating population viability and efficacy of conservation management using integrated population models. *J. Appl. Ecol.* **55**, 1380-1392, doi:10.1111/1365-2664.13080 (2018).
- 11 Doyle, S. *et al.* Temperature and precipitation at migratory grounds influence demographic trends of an Arctic-breeding bird. *Glob. Change Biol.* **26**, 5447-5458, doi:10.1111/gcb.15267 (2020).
- 12 Margalida, A. *et al.* An assessment of population size and demographic drivers of the Bearded Vulture using integrated population models. *Ecol Monogr* **90**, e01414, doi:10.1002/ecm.1414 (2020).
- 13 Morrison, C. A. *et al.* Covariation in population trends and demography reveals targets for conservation action. *Proc. R. Soc. Lond. B* **288**, 20202955, doi:10.1098/rspb.2020.2955 (2021).
- 14 Pardo, D. *et al.* Additive effects of climate and fisheries drive ongoing declines in multiple albatross species. *Proc. Natl. Acad. Sci. U.S.A.* **114**, E10829-E10837, doi:10.1073/pnas.1618819114 (2017).
- 15 Stillman, R. A. *et al.* Predicting impacts of food competition, climate, and disturbance on a long-distance migratory herbivore. *Ecosphere* **12**, doi:10.1002/ecs2.3405 (2021).
- 16 Azerefegne, F., Solbreck, C. & Ives, A. R. Environmental forcing and high amplitude fluctuations in the population dynamics of the tropical butterfly *Acraea acerata* (Lepidoptera: Nymphalidae). *J. Anim. Ecol.* **70**, 1032-1045, doi:10.1046/j.0021-8790.2001.00556.x (2001).
- 17 Jepsen, J. U., Hagen, S. B., Karlsen, S. R. & Ims, R. A. Phase-dependent outbreak dynamics of geometrid moth linked to host plant phenology. *Proc. R. Soc. Lond. B* **276**, 4119-4128, doi:10.1098/rspb.2009.1148 (2009).
- 18 Bonsall, M. B. & Benmayor, R. Multiple infections alter density dependence in host-pathogen interactions. *J. Anim. Ecol.* **74**, 937-945, doi:10.1111/j.1365-2656.2005.00991.x (2005).
- 19 Ma, Z. A unified survival-analysis approach to insect population development and survival times. *Sci. Rep.* **11**, 8223, doi:10.1038/s41598-021-87264-1 (2021).
- 20 Marini, G. *et al.* The role of climatic and density dependent factors in shaping mosquito population dynamics: the case of *Culex pipiens* in northwestern Italy. *PLoS One* **11**, e0154018, doi:10.1371/journal.pone.0154018 (2016).
- 21 Maud, J. L. *et al.* How does *Calanus helgolandicus* maintain its population in a variable environment? Analysis of a 25-year time series from the English Channel. *Progress in Oceanography* **137**, 513-523, doi:10.1016/j.pocean.2015.04.028 (2015).
- 22 McGeoch, M. A. & Price, P. W. Scale-dependent mechanisms in the population dynamics of an insect herbivore. *Oecologia* **144**, 278-288, doi:10.1007/s00442-005-0073-9 (2005).
- 23 Bellier, E., Kéry, M. & Schaub, M. Simulation-based assessment of dynamic N-mixture models in the presence of density dependence and environmental stochasticity. *Meth Ecol Evol* **7**, 1029-1040, doi:10.1111/2041-210X.12572 (2016).
- 24 Berryman, A. & Turchin, P. Identifying the density-dependent structure underlying ecological time series. *Oikos* **92**, 265-270 (2001).
- 25 Münster-Swendsen, M. & Berryman, A. Detecting the causes of population cycles by analysis of R-functions: the spruce needle-miner, *Epinotia tedella*, and its parasitoids in Danish spruce plantations. *Oikos* **108**, 495-502, doi:10.1111/j.0030-1299.2005.13747.x (2005).
- 26 Kolb, A., Dahlgren, J. P. & Ehrlén, J. Population size affects vital rates but not population growth rate of a perennial plant. *Ecology* **91**, 3210-3217, doi:10.1890/09-2207.1 (2010).
- 27 Bürgi, L. P., Roltsch, W. J. & Mills, N. J. Allee effects and population regulation: a test for biotic resistance against an invasive leafroller by resident parasitoids. *Popul. Ecol.* **57**, 215-225, doi:10.1007/s10144-014-0451-4 (2015).
- 28 Battaile, B. C. & Trites, A. W. Linking reproduction and survival can improve model estimates of vital rates derived from limited time-series counts of pinnipeds and other species. *PLoS One* **8**, e77389, doi:10.1371/journal.pone.0077389 (2013).
- 29 Turchin, P. *Complex Population Dynamics: A Theoretical/Empirical Synthesis*. (Princeton University Press, 2003).
- 30 Heppell, S. S., Caswell, H. & Crowder, L. B. Life histories and elasticity patterns: perturbation analysis for species with minimal demographic data. *Ecology* **81**, 654-665 (2000).
- 31 Oli, M. K. & Dobson, F. S. The relative importance of life-history variables to population growth rate in mammals: Cole's predictions revisited. *Am. Nat.* **161**, 422-440 (2003).

- 32 Sæther, B.-E. & Bakke, Ø. Avian life history variation and contribution of demographic traits to the population growth rate. *Ecology* **81**, 642-653, doi:10.1890/0012-9658(2000)081[0642:ALHVAC]2.0.CO;2 (2000).
- 33 Bradshaw, C. J. A. *et al.* Relative demographic susceptibility does not explain the extinction chronology of Sahul's megafauna. *eLife* **10**, e63870, doi:10.7554/eLife.63870 (2021).
- 34 Herrando-Pérez, S., Delean, S., Brook, B. W. & Bradshaw, C. J. A. Strength of density feedback in census data increases from slow to fast life histories. *Ecol Evol* **2**, 1922-1934, doi:10.1002/ece3.298 (2012).
- 35 Gaillard, J. M. *et al.* An analysis of demographic tactics in birds and mammals. *Oikos* **56**, 59-76 (1989).
- 36 Oakwood, M., Bradley, A. J. & Cockburn, A. Semelparity in a large marsupial. *Proc. R. Soc. Lond. B* **268**, 407-411 (2001).
- 37 Cockburn, A. in *Marsupial Biology: Recent Research, New Perspectives* (eds N. Saunders & L. Hinds) 163-171 (University of New South Wales Press, 1997).
- 38 Holz, P. H. & Little, P. B. Degenerative leukoencephalopathy and myelopathy in dasyurids. *J. Wildl. Dis.* **31**, 509-513 (1995).
- 39 Caswell, H. *Matrix Population Models: Construction, Analysis, and Interpretation, 2nd edn.* (Sinauer Associates, Inc., 2001).
- 40 Traill, L. W., Brook, B. W., Frankham, R. & Bradshaw, C. J. A. Pragmatic population viability targets in a rapidly changing world. *Biol. Conserv.* **143**, 28-34, doi:10.1016/j.biocon.2009.09.001 (2010).
- 41 Brook, B. W., Traill, L. W. & Bradshaw, C. J. A. Minimum viable population size and global extinction risk are unrelated. *Ecol. Lett.* **9**, 375-382 (2006).
- 42 Reed, D. H., O'Grady, J. J., Ballou, J. D. & Frankham, R. The frequency and severity of catastrophic die-offs in vertebrates. *Anim. Conserv.* **6**, 109-114, doi:10.1017/S1367943003147 (2003).
- 43 Bradshaw, C. J. A. *et al.* More analytical bite in estimating targets for shark harvest. *Mar. Ecol. Prog. Ser.* **488**, 221-232, doi:10.3354/meps10375 (2013).
- 44 Berryman, A. A. *Principles of Population Dynamics and Their Application.* (Stanley Thorners Ltd., 1999).
- 45 Verhulst, P. F. Notice sur la loi que la population poursuit dans son accroissement. *Correspondance mathématique et physique* **10**, 113-121 (1838).
- 46 Ricker, W. E. Stock and recruitment. *J Fish Res Board Can* **11**, 559-623 (1954).
- 47 Nelder, J. A. The fitting of a generalization of the logistic curve. *Biometrics* **17**, 89-110 (1961).
- 48 Burnham, K. P. & Anderson, D. R. *Model Selection and Multimodel Inference: A Practical Information-Theoretic Approach.* 2nd edn, (Springer-Verlag, 2002).
- 49 Doncaster, C. P. Non-linear density dependence in time series is not evidence of non-logistic growth. *Theor Popul Biol* **73**, 483-489 (2008).
- 50 McDonald, J. L. *et al.* Demographic buffering and compensatory recruitment promotes the persistence of disease in a wildlife population. *Ecol. Lett.* **19**, 443-449, doi:10.1111/ele.12578 (2016).
- 51 Sæther, B. E. *et al.* Demographic routes to variability and regulation in bird populations. *Nat. Comm.* **7**, 12001, doi:10.1038/ncomms12001 (2016).
- 52 Hebblewhite, M., Eacker, D. R., Eggeman, S., Bohm, H. & Merrill, E. H. Density-independent predation affects migrants and residents equally in a declining partially migratory elk population. *Oikos* **127**, 1304-1318, doi:10.1111/oik.05304 (2018).
- 53 Coulson, T. *et al.* Age, sex, density, winter weather and population crashes in soay sheep. *Science* **292**, 1528-1531 (2001).
- 54 Cubaynes, S. *et al.* Density-dependent intraspecific aggression regulates survival in northern Yellowstone wolves (*Canis lupus*). *J. Anim. Ecol.* **83**, 1344-1356, doi:10.1111/1365-2656.12238 (2014).
- 55 Staples, D. F., Taper, M. L. & Dennis, B. Estimating population trend and process variation for PVA in the presence of sampling error. *Ecology* **85**, 923-929, doi:10.1890/03-3101 (2004).
- 56 Knappe, J. & de Valpine, P. Are patterns of density dependence in the Global Population Dynamics Database driven by uncertainty about population abundance? *Ecol. Lett.* **15**, 17-23, doi:10.1111/j.1461-0248.2011.01702.x (2012).
- 57 Lieury, N. *et al.* Compensatory immigration challenges predator control: an experimental evidence-based approach improves management. *J Wildl Manag* **79**, 425-434, doi:10.1002/jwmg.850 (2015).
- 58 Thorson, J. T. *et al.* The importance of spatial models for estimating the strength of density dependence. *Ecology* **96**, 1202-1212, doi:10.1890/14-0739.1 (2015).
- 59 Johnson, D. W., Freiwald, J. & Bernardi, G. Genetic diversity affects the strength of population regulation in a marine fish. *Ecology* **97**, 627-639, doi:10.1890/15-0914 (2016).
- 60 Hoy, S. R. *et al.* Fluctuations in age structure and their variable influence on population growth. *Funct. Ecol.* **34**, 203-216, doi:10.1111/1365-2435.13431 (2020).
- 61 Lande, R. *et al.* Estimating density dependence from population time series using demographic theory and life-history data. *Am. Nat.* **159**, 321-337 (2002).

- 62 Wu, Z., Huang, N. E., Long, S. R. & Peng, C.-K. On the trend, detrending, and variability of nonlinear and nonstationary time series. *Proc. Natl. Acad. Sci. U.S.A.* **104**, 14889, doi:10.1073/pnas.0701020104 (2007).
- 63 Holyoak, M. & Baillie, S. R. Factors influencing detection of density dependence in British birds. II. Longevity and population variability. *Oecologia* **108**, 54-63 (1996).
- 64 Sæther, B.-E., Engen, S. & Matthysen, E. Demographic characteristics and population dynamical patterns of solitary birds. *Science* **295**, 2070-2073 (2002).
- 65 Horswill, C., O'Brien, S. H. & Robinson, R. A. Density dependence and marine bird populations: are wind farm assessments precautionary? *J. Appl. Ecol.* **54**, 1406-1414, doi:10.1111/1365-2664.12841 (2017).
